# Supplementary material for: Micellar catalysis of the Suzuki Miyaura reaction using biogenic Pd nanoparticles from Desulfovibrio alaskensis
Source: Green Chem. 2021 Oct 11;23(22):8886–90. doi: 10.1039/d1gc02392f (PMC8593813; doi:10.1039/d1gc02392f)
Supplement: GC-023-D1GC02392F-s001 [file GC-023-D1GC02392F-s001.pdf]

SUPPLEMENTARY INFORMATION

**Micellar catalysis of the Suzuki Miyaura reaction using  
biogenic Pd nanoparticles from *Desulfovibrio alaskensis***

**Yuta Era, Jonathan A. Dennis, Stephen Wallace\* and Louise E. Horsfall\***

*Institute of Quantitative Biology, Biochemistry and Biotechnology, School of Biological Sciences,  
University of Edinburgh, Roger Land Building, Alexander Crum Brown Road, King's Buildings,  
Edinburgh, EH9 3FF*

\*Correspondence to: [louise.horsfall@ed.ac.uk](mailto:louise.horsfall@ed.ac.uk); [stephen.wallace@ed.ac.uk](mailto:stephen.wallace@ed.ac.uk)

## Supplementary Materials

|            |                                                                                              |            |
|------------|----------------------------------------------------------------------------------------------|------------|
| <b>S1</b>  | <b>General materials and methods .....</b>                                                   | <b>S2</b>  |
| <b>S2</b>  | <b>Strain, media and culture condition .....</b>                                             | <b>S3</b>  |
| <b>S3</b>  | <b>DaPdNPs production by <i>Desulfovibrio alaskensis</i> .....</b>                           | <b>S3</b>  |
|            | <i>Fig. S1</i> Representative Electron micrographs of DaPdNPs                                |            |
|            | <i>Fig. S2</i> XRD pattern of the DaPdNPs synthesised by <i>D. alaskensis</i>                |            |
|            | <i>Fig. S3</i> ICP standard curve                                                            |            |
| <b>S4</b>  | <b>General Suzuki coupling reaction .....</b>                                                | <b>S5</b>  |
|            | <i>Fig. S4</i> Representative <sup>1</sup> H NMR spectra                                     |            |
|            | <i>Fig. S5</i> Result of control experiments                                                 |            |
| <b>S5</b>  | <b>Coupling reaction optimisation in aqueous solution .....</b>                              | <b>S7</b>  |
|            | <i>Table S1</i> Ligand/additive and halides screen                                           |            |
| <b>S6</b>  | <b>Coupling reaction with chemically produced Pd catalysts .....</b>                         | <b>S8</b>  |
|            | <i>Table S2</i> Coupling reaction promoted by chemically made Pd catalysts                   |            |
| <b>S7</b>  | <b>Micellar coupling reaction in the presence of various ligands .....</b>                   | <b>S8</b>  |
|            | <i>Table S3</i> Micellar coupling reaction in the presence of various ligands                |            |
| <b>S8</b>  | <b>Effect of TPGS-1000 on the reaction speed and the catalyst loading minimisation .....</b> | <b>S9</b>  |
|            | <i>Table S4</i> Time-course experiments and catalyst loading optimisation without TPGS-1000  |            |
| <b>S9</b>  | <b>Investigation of the reaction scope .....</b>                                             | <b>S10</b> |
|            | <i>Table S5</i> Reaction scope                                                               |            |
| <b>S10</b> | <b>Three-phase test .....</b>                                                                | <b>S13</b> |
|            | <i>Fig. S6</i> Three-phase test                                                              |            |
|            | <i>Table S6</i> Three-phase test                                                             |            |
| <b>S11</b> | <b>TEM analysis of DaPdNPs and TPGS micelles .....</b>                                       | <b>S14</b> |
|            | <i>Fig. S7</i> Negative stained DaPdNPs in the presence of 0.4% w/v TPGS-1000                |            |
|            | <i>Fig. S8</i> Negative stained DaPdNPs in the presence of 0.4% w/v TPGS-750-M               |            |
| <b>S12</b> | <b>Product and Pd separation .....</b>                                                       | <b>S17</b> |
|            | <i>Fig. S9</i> Pelleted DaPdNPs during liquid-liquid extraction                              |            |
| <b>S13</b> | <b>Product characterisation .....</b>                                                        | <b>S18</b> |
| <b>S14</b> | <b>References .....</b>                                                                      | <b>S25</b> |

## S1 General materials and methods

Unless otherwise noted, starting materials and reagents were obtained from commercial suppliers and were used without further purification. All water used experimentally was purified with a Suez Select purification system (18 mΩ/cm, 0.2 μM filter).

**NMR and IR:** Proton nuclear magnetic resonance spectra ( $^1\text{H}$  NMR) were recorded using an AVA 500 NMR spectrometer (Bruker) at the specified frequency at 298K. Proton chemical shifts are expressed in parts per million (ppm,  $\delta$  scale) and are referenced to residual protium in the NMR solvent ( $\text{CDCl}_3$ ,  $\delta$  7.26 ppm). Coupling constants,  $J$ , are measured to the nearest 0.1 Hz and are presented as observed. Data is represented as: chemical shift, integration, multiplicity (s = singlet, d = doublet, t = triplet, q = quartet, dd = doublet of doublet, m = multiplet and/or multiple resonances), coupling constant (J) in Hertz. NMR solvents were used as purchased from commercial suppliers. For all quantitative NMR measurements, 1,3,5-trimethoxybenzene (TMB) was used as an internal standard. Infrared (IR) spectroscopy was performed using a Spectrum Two IR spectrometer (Perkin Elmer).

**XRD:** X-ray diffraction experiments were recorded on a MiniFlex 600 benchtop X-ray diffractometer (Rigaku) with D/teX Ultra 1D silicon strip detector (Rigaku) using  $\text{CuK}\alpha$  radiation. Scanning was run at a  $2\theta$  angle from 20 to 100° with a 2° step size (40 kV, 15 mA).

**ICP-OES:** Inductively Coupled Plasma Optical Emission Spectrometry (ICP-OES) was performed using an Optima 8300 instrument (Perkin Elmer). Experiments were performed using the following conditions: samples were sonicated for 30 min at 21 °C in a water bath and then centrifuged ( $20,000 \times g$ , 2 h). The supernatant (the ionic fraction) was added to a solution of aqua regia ( $\text{HCl}:\text{HNO}_3 = 14:10\%$ ) and heated to 80°C for 8 h. The resulting sample was diluted in 2% nitric acid to a final volume of 3 mL and used immediately. Unspun samples (whole fraction) were prepared using an analogous method. When quantifying by ICP a standard curve was constructed over a range of analyte concentrations (0.04–10 ppm) providing linear relationships of  $\text{Intensity} = 41356c_{\text{Pd}} + 1573.4$ .

**TEM:** Transmission electron microscopy (TEM) was performed using a JEM-1400 Plus (JEOL) with an accelerating voltage of 80 kV. TEM images were captured using a GATAN OneView camera. Image processing was carried out using ImageJ software. Experiments were performed using the following conditions: suspensions of *Da*PdNPs were drop cast on to a 200 mesh carbon-coated copper grid and dried for 5 min under air. The excess liquid was then removed and the samples visualised immediately using a TEM (JEM-1400 Plus, JEOL) with an accelerating voltage of 80 kV.

## **S2      Strain, media, buffer and culture condition**

*Desulfovibrio alaskensis* G20 (DSM 17464) was obtained from DSMZ. *Desulfovibrio alaskensis* G20 (DSM 17464) was grown statically on de-gassed Postgate Medium C at 30 °C in an anaerobic chamber fed with 10% H<sub>2</sub> and 10% CO<sub>2</sub> in nitrogen. Optical densities of *D. alaskensis* cultures were determined using a WPA CO8000 spectrophotometer (Biochorm) by measuring absorbance at 600 nm.

Postgate Medium C was prepared according to the following procedure: KH<sub>2</sub>PO<sub>4</sub> (0.5 g), NH<sub>4</sub>Cl (1.0 g), Na<sub>2</sub>SO<sub>4</sub> (4.5 g), CaCl<sub>2</sub>·6H<sub>2</sub>O (0.06 g), MgSO<sub>4</sub>·7H<sub>2</sub>O (0.06 g), 60% sodium lactate (10 mL) yeast extract (1.0 g), FeSO<sub>4</sub>·7H<sub>2</sub>O (0.004 g) and sodium citrate·2H<sub>2</sub>O (0.3 g) were dissolved in 990 mL ultrapure water and its pH was adjusted to 7.5 using 2 M NaOH. The medium was autoclaved at 121 °C for 20 min and cooled to room temperature. Autoclaved Postgate Medium C was stored at room temperature and degassed in the anaerobic chamber overnight before the use.

MOPs buffer was prepared according to the following procedure: MOPs free acid (41.86 g) was dissolved in 1 L ultrapure water and its pH was adjusted to 7.0 using 1 M H<sub>2</sub>SO<sub>4</sub>. The buffer was autoclaved at 121 °C for 20 min and cooled to room temperature. Autoclaved MOPs buffer was stored at room temperature and degassed in the anaerobic chamber overnight before the use.

## **S3      DaPdNPs production by *Desulfovibrio alaskensis***

*D. alaskensis* cells were pre-grown following previously reported methods<sup>[1]</sup>, recovered and washed with MOPs buffer three times prior to inoculation (to a final OD<sub>600</sub> of 1.0) in 50 mL centrifuge tubes containing 40 mL MOPs buffer. Freshly made Na<sub>2</sub>PdCl<sub>4</sub> stock solution (40 mM in H<sub>2</sub>O) was added to the cell suspension to a final concentration of 2 mM. The centrifuge tubes were incubated at 30 °C for 20 h in an anaerobic chamber. The biogenic nanoparticles (*DaPdNPs*) were harvested by centrifugation at 15 min, 4,500 × g and washed with 50% acetone in H<sub>2</sub>O (1 x vol equiv.). Subsequently, the *DaPdNPs* were freeze-dried overnight, resuspended in ultrapure water and sonicated in a water bath for 30 min. The resulting nanoparticles were analysed by XRD and TEM. The recovery of Pd as *DaPdNPs* was determined by ICP-OES.

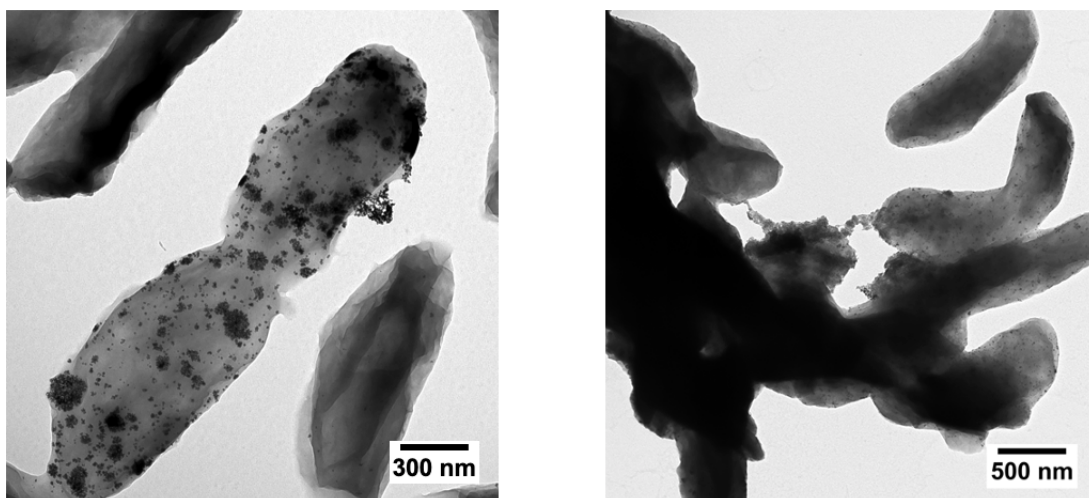

**Fig. S1** Representative Electron micrographs of DaPdNPs.

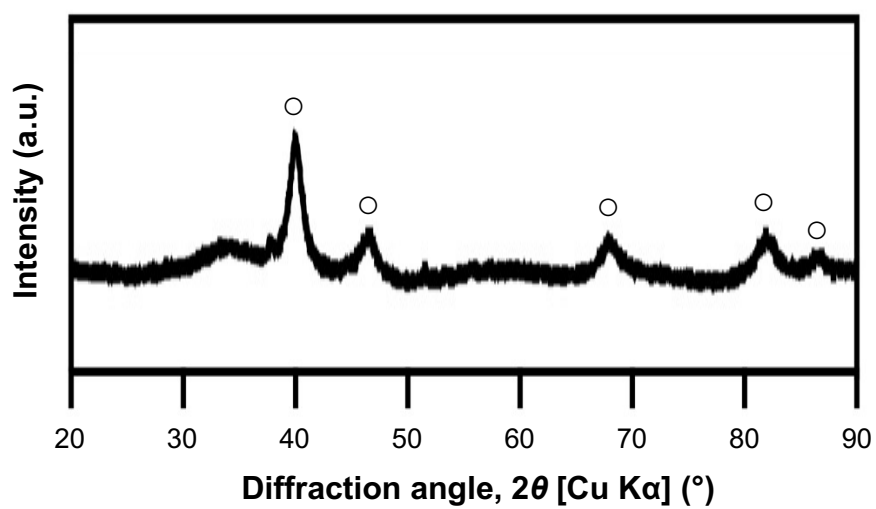

**Fig. S2** XRD pattern of the DaPdNPs synthesised by *D. alaskensis*. The symbol ○ is assigned to palladium (JCPDS 87-0641).

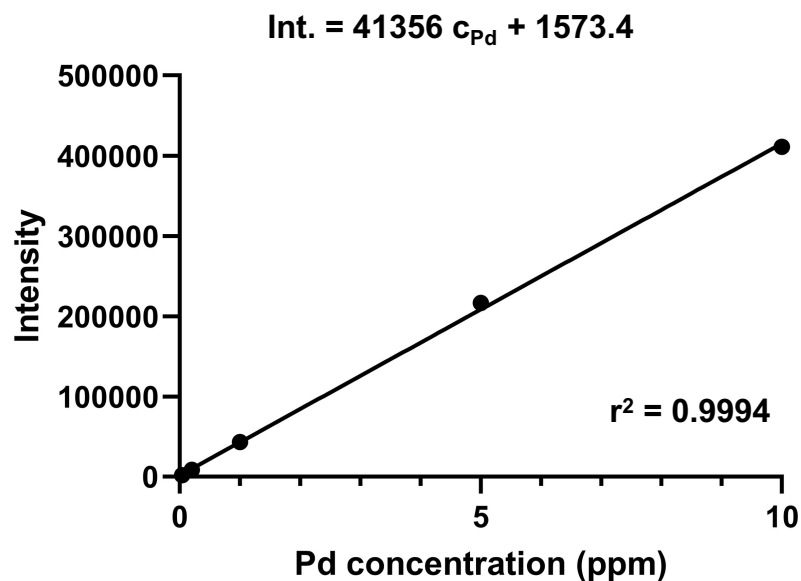

**Fig. S3** ICP standard curve used for the quantification of palladium recovered as DaPdNP. DaPdNP was ionised with aqua regia prior to the analysis.

#### S4 General Suzuki coupling reaction

Cross coupling reactions were carried out using the following procedure: DaPdNPs were added to a 15 mL Hungate tube containing aryl halide (25 mM), phenyl boronic acid (30 mM),  $K_2CO_3$  (30 mM) and TPGS-1000/TPGS-750-M (2% w/v) in  $H_2O$  (5 mL). The tubes were sealed with butyl rubber septa and screw-caps and incubated at 37 °C (200 rpm) for 20 h in a New Brunswick Innova 44 incubator shaker (Eppendorf). After this time, the reactions were cooled to room temperature, extracted with methyl *tert*-butyl ether (MTBE, 3 x 1.7 mL) and concentrated under reduced pressure. The crude residue was dissolved in 1 mL  $CDCl_3$  containing 10 mM TMB and analysed by  $^1H$  NMR spectroscopy.

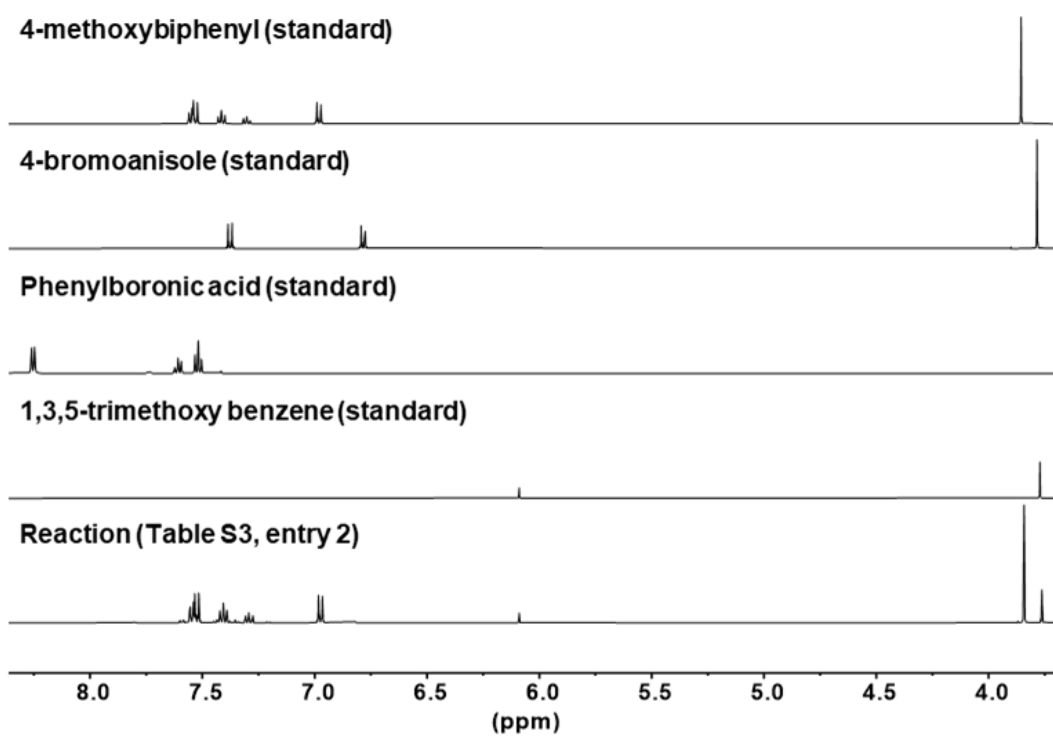

**Fig. S4** Representative  $^1\text{H}$  NMR spectra.

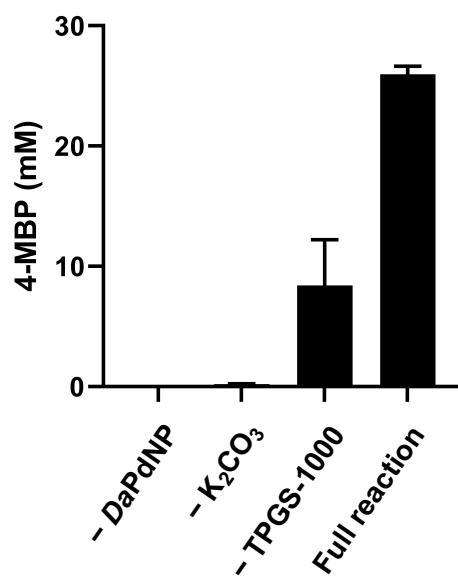

**Fig. S5** Result of control experiments. Full reaction was conducted using DaPdNPs (0.25 mM), 4-bromoanisole (25 mM), phenylboronic acid (30 mM),  $\text{K}_2\text{CO}_3$  (30 mM) and TPGS-1000 (2% w/v) in  $\text{H}_2\text{O}$  (5 mL).

## S5 Coupling reaction optimisation in aqueous solution

Unless otherwise noted, model reaction (*Da*PdNPs (0.25 mM), 4-bromanisole (25 mM), phenylboronic acid (30 mM), K<sub>2</sub>CO<sub>3</sub> (30 mM) in H<sub>2</sub>O (5 mL)) was used by following the above protocol for reaction optimisation and screening experiments. For ligand/additive screening, triphenylphosphine (PPh<sub>3</sub>), JohnPhos, SPhos, XPhos, sSPhos, 4-aminopyridine-2,6-diol (AmPyol), 1,1,3,3-tetramethylguanidine (TMG) or green tea polyphenols was added to the model reaction (2.5 mM for ligands and 0.1/ or 0.01 % w/v for green tea polyphenols). For halide screening, 4-chloroanisole/4-iodoanisole (25 mM) was used as the coupling partner instead of 4-bromoanisole.

**Table S1** Ligand/additive and halides screen

| #  | Ar-X                                                                                | Ar-B(OH) <sub>2</sub>                                                               | Ligand           | <i>Da</i> PdNPs loading (mol%) | Additive                          | Yield |     |
|----|-------------------------------------------------------------------------------------|-------------------------------------------------------------------------------------|------------------|--------------------------------|-----------------------------------|-------|-----|
|    |                                                                                     |                                                                                     |                  |                                |                                   | mM    | ±SD |
| 1  | 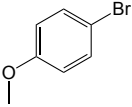 | 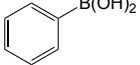 | —                | 1.0                            | —                                 | 8.4   | 3.8 |
| 2  |                                                                                     |                                                                                     | PPh <sub>3</sub> |                                |                                   | 6.0   | 0.3 |
| 3  |                                                                                     |                                                                                     | JohnPhos         |                                |                                   | 9.0   | 1.1 |
| 4  |                                                                                     |                                                                                     | SPhos            |                                |                                   | 8.1   | 1.9 |
| 5  |                                                                                     |                                                                                     | XPhos            |                                |                                   | 14.0  | 1.8 |
| 6  |                                                                                     |                                                                                     | TMG              |                                |                                   | 15.6  | 1.4 |
| 7  |                                                                                     |                                                                                     | AmPyol           |                                |                                   | 5.0   | 0.5 |
| 8  |                                                                                     |                                                                                     | sSPhos           |                                |                                   | 1.6   | 0.2 |
| 9  |                                                                                     |                                                                                     | —                | 1.0                            | Green tea polyphenols (0.1% w/v)  | 0.4   | 0.1 |
| 10 |                                                                                     |                                                                                     | —                |                                | Green tea polyphenols (0.01% w/v) | 6.4   | 0.5 |
| 11 | 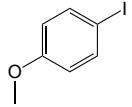 |                                                                                     | —                | 1.0                            | —                                 | 9.0   | 0.5 |
| 12 | 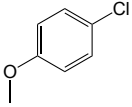 |                                                                                     | —                | 1.0                            |                                   | 0.2   | 0.0 |

The yield shown above is the average of triplicate experiments.

## S6 Coupling reaction with chemically produced Pd catalysts

Chemically produced Pd nanoparticle (cPdNP, 0.25 mM) or Pd on activated carbon (Pd/C, 0.25 mM) was added to the model reaction with/without ligands (XPhos or TMG, 2.5 mM) in place of DaPdNPs. The reactions were conducted and analysed by following the protocol in Section S4.

**Table S2** Coupling reaction promoted by chemically made Pd catalysts

| # | Ar-X                                                                              | Ar-B(OH) <sub>2</sub>                                                             | Ligand | Pd catalyst | Additive | Yield |     |
|---|-----------------------------------------------------------------------------------|-----------------------------------------------------------------------------------|--------|-------------|----------|-------|-----|
|   |                                                                                   |                                                                                   |        |             |          | mM    | ±SD |
| 1 | 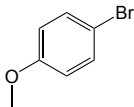 | 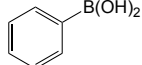 | —      | cPdNPs      | —        | 0.2   | 0.2 |
| 2 |                                                                                   |                                                                                   | XPhos  |             |          | 0.2   | 0.0 |
| 3 |                                                                                   |                                                                                   | TMG    |             |          | 0.3   | 0.2 |
| 4 |                                                                                   |                                                                                   | —      | Pd/C        |          | 0.1   | 0.0 |
| 5 |                                                                                   |                                                                                   | XPhos  |             |          | 1.3   | 0.5 |
| 6 |                                                                                   |                                                                                   | TMG    |             |          | 0.4   | 0.7 |

The yield shown above is the average of triplicate experiments.

## S7 Micellar coupling reaction in the presence of various ligands

The model reaction containing no ligand, JohnPhos, SPhos, XPhos or TMG (2.5 mM) was conducted in the presence of TPGS-750-M or TPGS-1000 (2% w/v). The reactions were conducted and analysed by following the protocol in Section S4.

**Table S3** Micellar coupling reaction in the presence of various ligands

| #                | Ar-X                                                                                | Ar-B(OH) <sub>2</sub>                                                               | Ligand   | DaPdNPs loading (mol%) | Additive   | Yield |     |  |
|------------------|-------------------------------------------------------------------------------------|-------------------------------------------------------------------------------------|----------|------------------------|------------|-------|-----|--|
|                  |                                                                                     |                                                                                     |          |                        |            | mM    | ±SD |  |
| 1                | 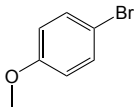 | 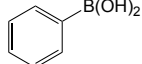 | -        | 1.0                    | TPGS-750-M | 20.8  | 1.4 |  |
| 2                |                                                                                     |                                                                                     |          |                        | TPGS-1000  | >25   | 0.7 |  |
| 3                |                                                                                     |                                                                                     | JohnPhos |                        | TPGS-750-M | 11.1  | 1.0 |  |
| 4                |                                                                                     |                                                                                     |          |                        | TPGS-1000  | 22.2  | 1.0 |  |
| 5                |                                                                                     |                                                                                     | SPhos    |                        | TPGS-750-M | 12.0  | 0.9 |  |
| 6                |                                                                                     |                                                                                     |          |                        | TPGS-1000  | 18.3  | 0.7 |  |
| 7 <sup>[a]</sup> |                                                                                     |                                                                                     | XPhos    |                        | TPGS-750-M | 21.5  | 2.1 |  |
| 8                |                                                                                     |                                                                                     |          |                        | TPGS-1000  | >25   | 2.2 |  |
| 9                |                                                                                     |                                                                                     | TMG      |                        | TPGS-750-M | 19.3  | 0.9 |  |
| 10               |                                                                                     |                                                                                     |          |                        | TPGS-1000  | 24.9  | 1.0 |  |

The yield shown above is the average of triplicate experiments ([a]: duplicate).

## S8 Effect of TPGS-1000 on the reaction speed and the catalyst loading minimisation

Reactions containing TPGS-1000 (2% w/v) or no surfactant and either no ligand, XPhos or TMG (2.5 mM) was sealed and incubated at 37 °C (200 rpm) in a New Brunswick Innova 44 incubator shaker (Eppendorf). Reactions were collected at 1, 2, 4, 20 and 40 h, and extracted with extracted with MTBE (3 x 1.7 mL) immediately. For the catalyst loading minimisation experiment, the concentration of *Da*PdNPs was adjusted to 0.01, 0.05, 0.1, 0.5 or 1.0 in the ligand-free model reaction with/without TPGS-1000 (2% w/v). The reactions and catalyst-free control reaction were sealed and incubated at 37 °C (200 rpm) for 20 h. The following analysis was carried out as outlined in Section S4.

**Table S4** Time-course experiments and catalyst loading optimisation without TPGS-1000

| #  | Ar-X                                                                                | Ar-B(OH) <sub>2</sub>                                                               | Ligand | Reaction time (h) | <i>Da</i> PdNP s loading (mol%) | Additive  | Yield |     |
|----|-------------------------------------------------------------------------------------|-------------------------------------------------------------------------------------|--------|-------------------|---------------------------------|-----------|-------|-----|
|    |                                                                                     |                                                                                     |        |                   |                                 |           | mM    | ±SD |
| 1  | 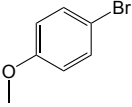  | 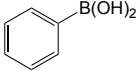  | —      | 1                 | 1.0                             | —         | 1.3   | 0.4 |
| 2  |                                                                                     |                                                                                     |        | 2                 |                                 |           | 1.8   | 0.9 |
| 3  |                                                                                     |                                                                                     |        | 4                 |                                 |           | 5.0   | 0.9 |
| 4  |                                                                                     |                                                                                     |        | 20                |                                 |           | 8.4   | 3.8 |
| 5  |                                                                                     |                                                                                     |        | 40                |                                 |           | 7.0   | 4.8 |
| 6  |                                                                                     |                                                                                     |        | 1                 |                                 | TPGS-1000 | 11.7  | 3.2 |
| 7  |                                                                                     |                                                                                     |        | 2                 |                                 |           | 21.0  | 0.7 |
| 8  |                                                                                     |                                                                                     |        | 4                 |                                 |           | 22.5  | 3.5 |
| 9  |                                                                                     |                                                                                     |        | 20                |                                 |           | >25   | 0.8 |
| 10 |                                                                                     |                                                                                     |        | 40                |                                 |           | >25   | 1.0 |
| 11 | 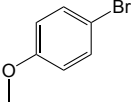 | 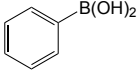 | XPhos  | 1                 | 1.0                             | —         | 0.8   | 0.2 |
| 12 |                                                                                     |                                                                                     |        | 2                 |                                 |           | 0.9   | 0.7 |
| 13 |                                                                                     |                                                                                     |        | 4                 |                                 |           | 1.5   | 0.9 |
| 14 |                                                                                     |                                                                                     |        | 20                |                                 |           | 9.4   | 2.3 |
| 15 |                                                                                     |                                                                                     |        | 40                |                                 |           | 6.7   | 1.4 |
| 16 |                                                                                     |                                                                                     |        | 1                 |                                 | TPGS-1000 | 4.6   | 0.4 |
| 17 |                                                                                     |                                                                                     |        | 2                 |                                 |           | 18.4  | 3.1 |
| 18 |                                                                                     |                                                                                     |        | 4                 |                                 |           | >25   | 1.1 |
| 19 |                                                                                     |                                                                                     |        | 20                |                                 |           | >25   | 0.5 |
| 20 |                                                                                     |                                                                                     |        | 40                |                                 |           | >25   | 2.0 |
| 21 | 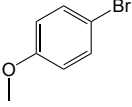 | 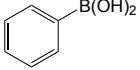 | TMG    | 1                 | 1.0                             | —         | 5.2   | 0.7 |
| 22 |                                                                                     |                                                                                     |        | 2                 |                                 |           | 8.2   | 1.4 |
| 23 |                                                                                     |                                                                                     |        | 4                 |                                 |           | 11.3  | 1.6 |
| 24 |                                                                                     |                                                                                     |        | 20                |                                 |           | 15.6  | 1.4 |
| 25 |                                                                                     |                                                                                     |        | 40                |                                 |           | 14.8  | 2.6 |

|    |                                                                                   |                                                                                   |   |    |      |           |      |      |
|----|-----------------------------------------------------------------------------------|-----------------------------------------------------------------------------------|---|----|------|-----------|------|------|
| 26 |                                                                                   |                                                                                   |   | 1  |      |           | 10.7 | 0.6  |
| 27 |                                                                                   |                                                                                   |   | 2  |      |           | 21.5 | 1.6  |
| 28 |                                                                                   |                                                                                   |   | 4  |      | TPGS-1000 | 23.2 | 3.0  |
| 29 |                                                                                   |                                                                                   |   | 20 |      |           | >25  | 2.4  |
| 30 |                                                                                   |                                                                                   |   | 40 |      |           | >25  | 1.2  |
| 31 |                                                                                   |                                                                                   |   |    | 0    |           | N.D. | N.A. |
| 32 |                                                                                   |                                                                                   |   |    | 0.01 |           | 0.2  | 0.2  |
| 33 |                                                                                   |                                                                                   |   |    | 0.05 |           | 0.5  | 0.3  |
| 34 |                                                                                   |                                                                                   |   | 20 | 0.1  | —         | 1.0  | 0.7  |
| 35 |                                                                                   |                                                                                   |   |    | 0.5  |           | 4.7  | 4.3  |
| 36 |                                                                                   |                                                                                   |   |    | 1.0  |           | 6.2  | 4.5  |
| 37 | 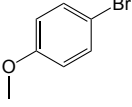 | 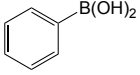 | — |    | 0    |           | N.D. | N.A. |
| 38 |                                                                                   |                                                                                   |   |    | 0.01 |           | 0.1  | 0.1  |
| 39 |                                                                                   |                                                                                   |   |    | 0.05 | TPGS-1000 | 0.6  | 0.2  |
| 40 |                                                                                   |                                                                                   |   | 20 | 0.1  |           | 7.7  | 3.2  |
| 41 |                                                                                   |                                                                                   |   |    | 0.5  |           | >25  | 0.2  |
| 42 |                                                                                   |                                                                                   |   |    | 1.0  |           | >25  | 1.5  |

The yield shown above is the average of triplicate experiments (N.D.: Not detected, N.A.: Not applicable).

## S9 Investigation of the reaction scope

Aryl bromide (4-bromoacetophenone, 3-bromoacetophenone, 2-bromoacetophenone, 1-bromo-4-nitrobenzene or 4-bromophenol: 25 mM) and boronic acid (*p*-tolylboronic acid, 2-methoxy-3-pyridinylboronic acid, 4-ethoxyphenylboronic acid, 3-ethoxyphenylboronic acid, 3-ethoxyphenylboronic acid :30 mM) were added to Hungate tube containing *Da*PdNPs (0.25 mM) and K<sub>2</sub>CO<sub>3</sub> (30 mM) in H<sub>2</sub>O (5 mL). Reactions of 25 different cross-coupling combination were carried out and analysed as outlined in Section S4. Subsequently, for the reactions resulting in less than 80% yield, the identical coupling reactions were conducted in the presence of TPGS-1000 (2% w/v).

**Table S5** Reaction scope

| #                | Ar-X                                                                                | Ar-B(OH) <sub>2</sub>                                                               | Ligand | DaPdNPs loading (mol%) | Additive  | Yield |      |
|------------------|-------------------------------------------------------------------------------------|-------------------------------------------------------------------------------------|--------|------------------------|-----------|-------|------|
|                  |                                                                                     |                                                                                     |        |                        |           | mM    | ±SD  |
| 1                | 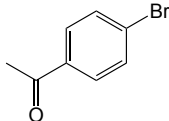   | 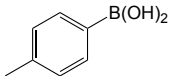   | —      | 1.0                    | —         | >25   | 1.5  |
| 2                |                                                                                     | 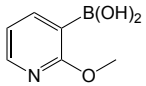   |        |                        | —         | 21.6  | 1.7  |
| 3                |                                                                                     | 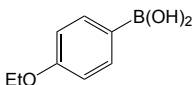   |        |                        | —         | >25   | 1.5  |
| 4                |                                                                                     | 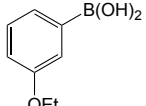   |        |                        | —         | >25   | 0.2  |
| 5                |                                                                                     | 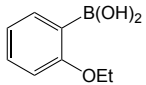 |        |                        | —         | >25   | 1.1  |
| 6                | 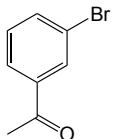 | 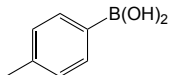 | —      | 1.0                    | —         | >25   | 0.6  |
| 7                |                                                                                     | 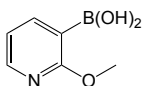 |        |                        | —         | 12.5  | 5.3  |
| 8 <sup>[b]</sup> |                                                                                     |  |        |                        | TPGS-1000 | 24.3  | N.A. |
| 9                |                                                                                     | 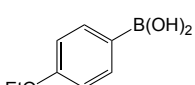 |        |                        | —         | >25   | 1.5  |
| 10               |                                                                                     | 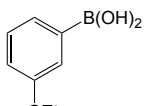 |        |                        | —         | >25   | 1.3  |
| 11               |                                                                                     | 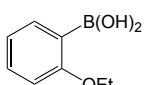 |        |                        | —         | >25   | 1.5  |

|                   |  |  |   |     |           |      |      |
|-------------------|--|--|---|-----|-----------|------|------|
| 12 <sup>[a]</sup> |  |  | — | 1.0 | —         | 11.3 | 0.5  |
| 13 <sup>[a]</sup> |  |  |   |     | TPGS-1000 | 12.1 | 3.9  |
| 14                |  |  |   |     | —         | N.D. | N.A. |
| 15                |  |  |   |     | TPGS-1000 | N.D. | N.A. |
| 16 <sup>[a]</sup> |  |  |   |     | —         | 4.1  | 0.3  |
| 17 <sup>[a]</sup> |  |  |   |     | TPGS-1000 | 9.4  | 0.4  |
| 18                |  |  |   |     | —         | 4.5  | 0.1  |
| 19                |  |  |   |     | TPGS-1000 | 4.8  | 0.0  |
| 20                |  |  |   |     | —         | 0.9  | 0.2  |
| 21                |  |  |   |     | TPGS-1000 | 2.0  | 0.2  |
| 22                |  |  | — | 1.0 | —         | 22.6 | 6.1  |
| 23 <sup>[a]</sup> |  |  |   |     | —         | 3.7  | 0.0  |
| 24 <sup>[a]</sup> |  |  |   |     | TPGS-1000 | 18.1 | 0.2  |
| 25                |  |  |   |     | —         | 21.2 | 1.7  |
| 26                |  |  |   |     | —         | 24.6 | 2.0  |
| 27 <sup>[a]</sup> |  |  |   |     | —         | 17.7 | 0.6  |
| 28 <sup>[a]</sup> |  |  |   |     | TPGS-1000 | 18.8 | 0.7  |
| 29                |  |  | — | 1.0 | —         | 24.6 | 1.7  |

|                   |                                                                                   |                                                                                   |   |     |           |      |      |
|-------------------|-----------------------------------------------------------------------------------|-----------------------------------------------------------------------------------|---|-----|-----------|------|------|
| 30                | 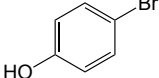 | 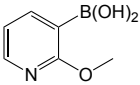 | — | 1.0 | —         | 4.0  | 0.4  |
| 31 <sup>[a]</sup> |                                                                                   |                                                                                   |   |     | TPGS-1000 | 10.2 | 0.6  |
| 32                |                                                                                   | 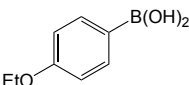 |   |     | —         | 18.6 | 1.7  |
| 33                |                                                                                   |                                                                                   |   |     | TPGS-1000 | 21.3 | 0.6  |
| 34                |                                                                                   | 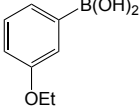 |   |     | —         | 23.0 | 0.5  |
| 35 <sup>[a]</sup> |                                                                                   | 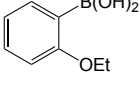 |   |     | —         | N.D. | N.A. |
| 36 <sup>[a]</sup> |                                                                                   |                                                                                   |   |     | TPGS-1000 | 10.6 | 0.7  |

The yield shown above is the average of triplicate experiments ([a]: duplicate, [b]: no replicate, N.D.: Not detected, N.A.: Not applicable).

### S10 Three-phase test

For the solid support, the Wang resin, a polystyrene based resin with a p-benzyloxybenzyl alcohol linker often used in solid phase peptide synthesis was chosen<sup>[2]</sup>. Iodobenzoic acid bound to a Wang resin was synthesised according to the following procedure: Wang resin (2.0 g, 1.0 mmol/g loading) was added to a solution of dichloromethane:*N,N*-dimethylformamide (9:1, 20 mL) and stirred for 15 min. *N,N'*-diisopropylcarbodiimide (930  $\mu$ L, 300 mM), 4-iodobenzoic acid (2.5 g, 500 mM) and 4-(dimethylamino)pyridine (1.0 mg, 0.4 mM) were added to the mixture and the reaction was stirred for 3 days at room temperature (21 °C). The resin was recovered by filtration, washed with dichloromethane (3 x 20 mL) and dried under vacuum. Formation of the target compound was confirmed by the appearance of a characteristic ester stretch in the IR spectrum of the product at 1615  $\text{cm}^{-1}$ . For the three-phase test, polymer-supported iodobenzoic acid was added in place of haloaryls following standard cross-coupling reaction conditions. After incubation, the solid was collected by vacuum filtration, washed with dichloromethane (4 x 5.0 mL), dried under vacuum, dissolved in TFA:dichloromethane (9:1, 2.0 mL) and stirred at room temperature for 2 h. The resin was collected by vacuum filtration and washed with dichloromethane (4 x 5.0 mL). The combined organic layers were concentrated under reduced pressure. Control reactions were conducted using methyl 4-iodobenzoate (33 mg, 25 mM, 1.0 equiv) instead of the polymer-supported iodobenzoic acid and analysed according to the general procedure outlined in Section S4.

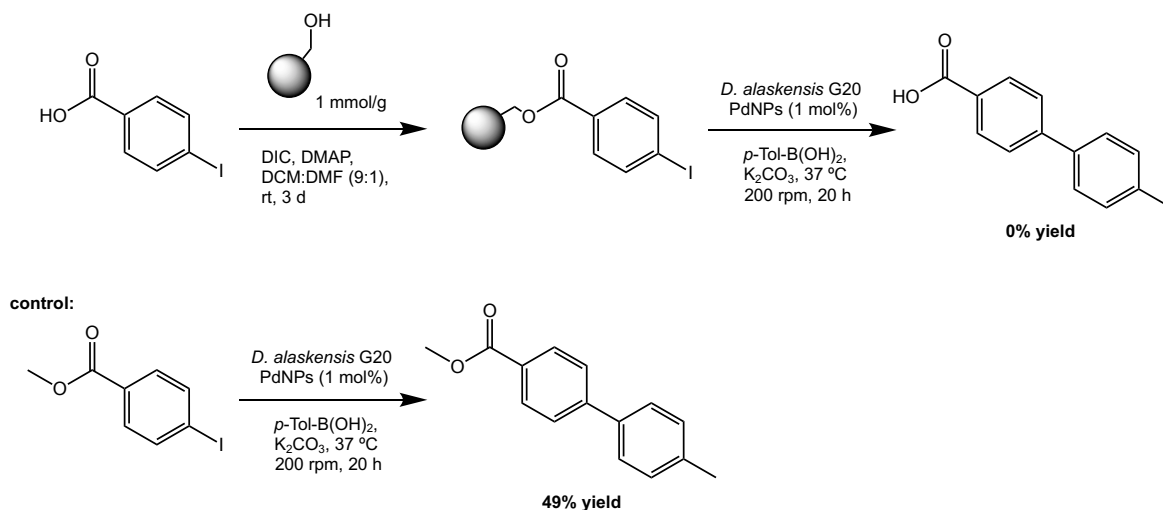

**Fig. S6** Three-phase test

**Table S6** Three-phase test

| # | Ar-X | Ar-B(OH) <sub>2</sub> | Ligand | DaPdNPs loading (mol%) | Additive | Yield |      |
|---|------|-----------------------|--------|------------------------|----------|-------|------|
|   |      |                       |        |                        |          | mM    | ±SD  |
| 1 |      |                       | —      | 1.0                    | —        | N.D.  | N.A. |
| 2 |      |                       |        |                        |          | 12.2  | 3.5  |

The yield shown above is the average of duplicate experiments (N.D.: Not detected, N.A.: Not applicable).

### S11 TEM analysis of DaPdNPs and TPGS micelles

Samples were prepared for TEM analysis by incubating DaPdNPs (0.25 mM) and TPGS-1000 or TPGS-750-M (0.4% w/v) in H<sub>2</sub>O at 37 °C (220 rpm) for 12 h. One drop was then transferred on to a Formvar/Carbon 200 mesh Copper grid and left to dry in air for 10 min. Excess solution was removed by touching the grid edge with filter paper. A drop of 1% aqueous uranyl acetate was applied for 1 minute and then removed by touching the grid edge with filter paper. TEM observation was carried out as described in Section S1.

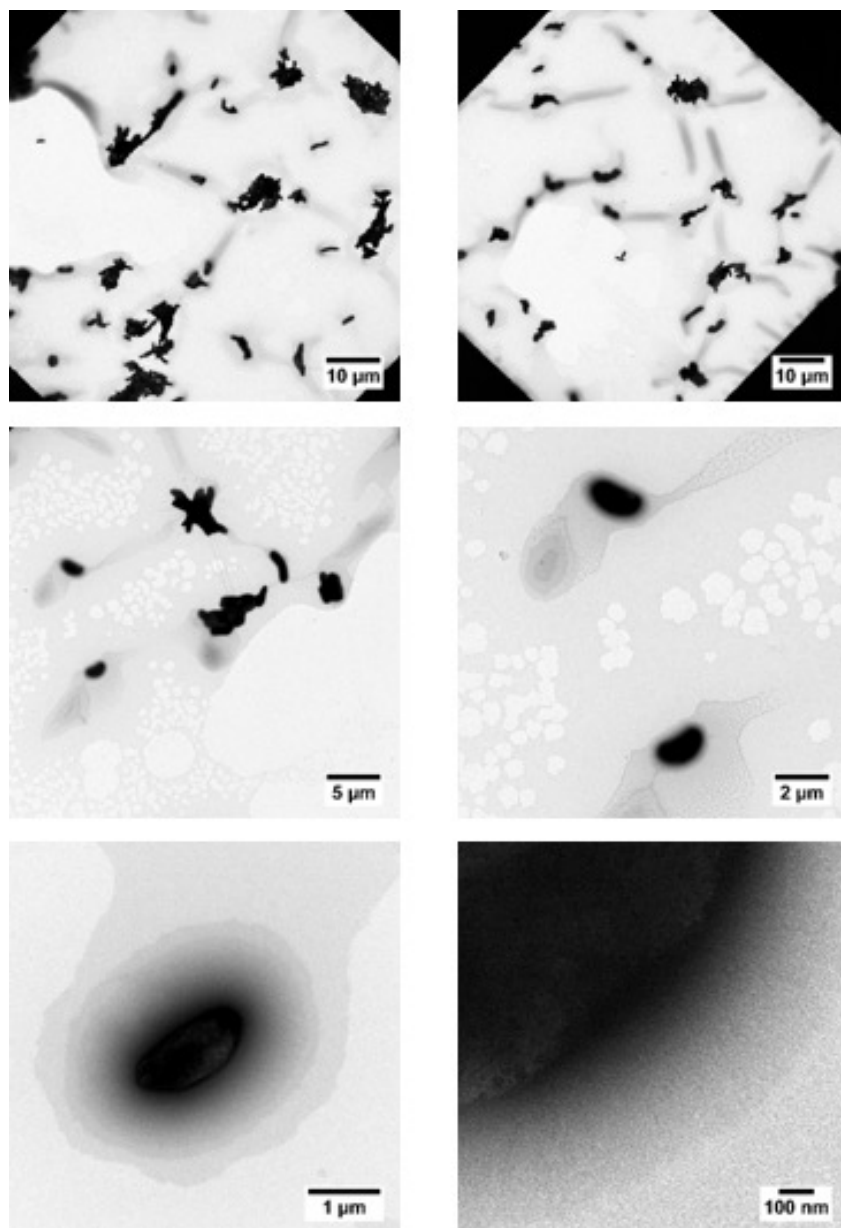

**Fig. S7** Negative stained DaPdNPs in the presence of 0.4% w/v TPGS-1000

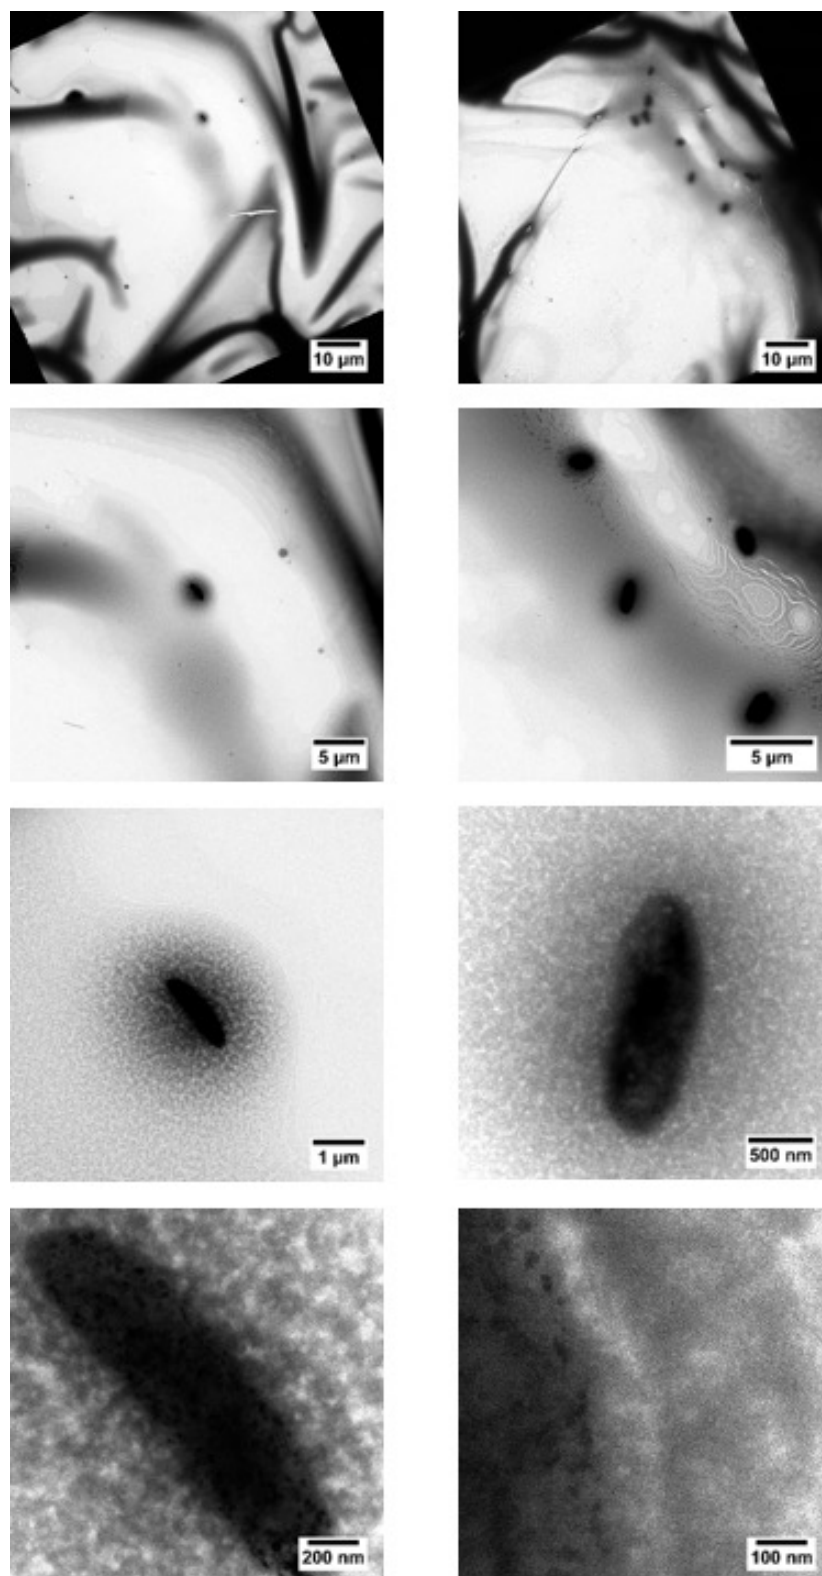

**Fig. S8** Negative stained DaPdNPs in the presence of 0.4% w/v TPGS-750-M

## S12 Product and Pd separation

The model reaction containing TPGS-1000 was conducted, extracted and concentrated as described above. The crude residue was dissolved in 10% ethanol (5 mL). An aliquot of the filtered solution (1 mL) was diluted in 1-methoxy-2-propanol to a final volume of 5 mL and analysed by ICP-OES immediately. As a result, no detectable amount of Pd was quantified in the sample (the calculated LoD<sup>[3]</sup>: 0.02  $\mu$ M). This demonstrated the cross-coupling product can be easily separated from *DaPdNPs* catalyst in the extraction process, meaning no extra separation steps are required.

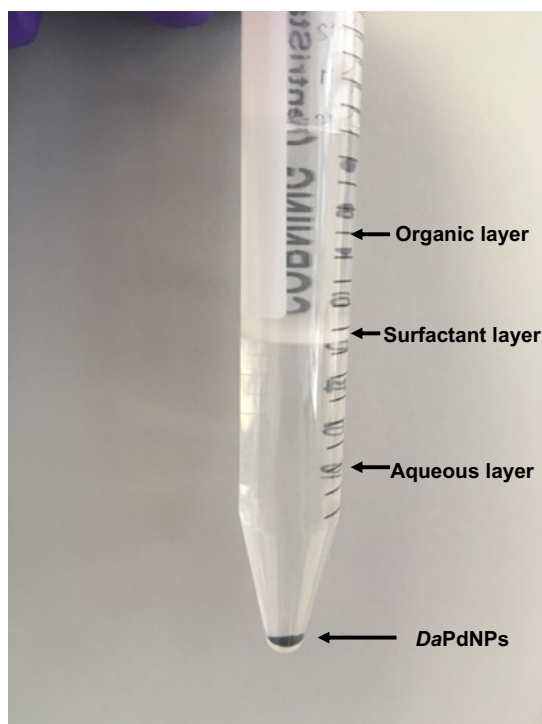

**Fig. S9** Pelleted *DaPdNPs* during liquid-liquid extraction

## S13 Product Characterisation

### 4-Methoxybiphenyl

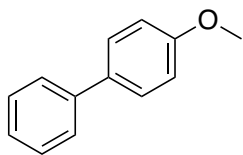

<sup>1</sup>H NMR (500 MHz, CDCl<sub>3</sub>):  $\delta$  = 7.31–7.25 (m, 2H), 7.27–7.24 (m, 2H), 7.17–7.10 (m, 2H), 7.06–6.98 (m, 1H), 6.80–6.62 (m, 2H), 3.57 (s, 3H).

Spectroscopic data in good agreement with the literature.<sup>[4]</sup>

### 4'-Methyl-4-biphenylcarboxylate

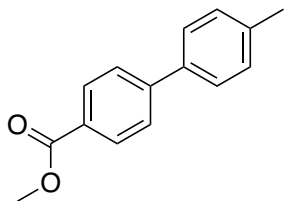

<sup>1</sup>H NMR (500 MHz, DMSO):  $\delta$  = 8.15–8.08 (m, 2H), 7.91–7.85 (m, 2H), 7.74–7.68 (m, 2H), 7.43–7.36 (m, 2H), 3.97 (s, 3H), 2.45 (s, 3H).

Spectroscopic data in good agreement with the literature.<sup>[5]</sup>

### 1-(4'-Methyl-4-biphenyl)ethenone

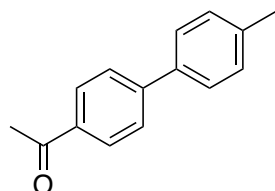

<sup>1</sup>H NMR (500 MHz, CDCl<sub>3</sub>):  $\delta$  = 8.13–8.09 (m, 2H), 7.78–7.74 (m, 2H), 7.66–7.60 (m, 2H), 7.41–7.35 (m, 2H), 2.72 (s, 3H), 2.51 (s, 3H).

Spectroscopic data in good agreement with the literature.<sup>[5]</sup>

### 1-[4-(2-Methoxy-3-pyridinyl)phenyl]ethenone

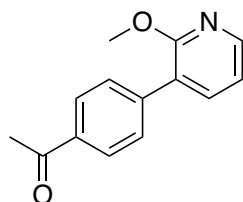

$^1\text{H}$  NMR (500 MHz,  $\text{CDCl}_3$ ):  $\delta$  = 8.30 (dd,  $J$  = 4.9, 1.9, 1H), 8.17–8.05 (m, 2H), 7.78–7.75 (m, 2H), 7.74 (dd,  $J$  = 7.3, 1.9, 1H), 7.10 (dd,  $J$  = 7.3, 5.0, 1H), 4.09 (s, 3H), 2.74 (s, 3H). Spectroscopic data in good agreement with the literature.<sup>[6]</sup>

**1-(4'-Ethoxy-4-biphenyl)ethenone**

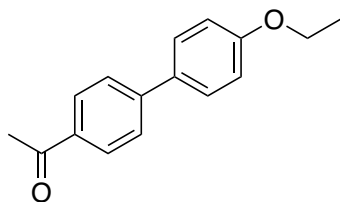

$^1\text{H}$  NMR (500 MHz,  $\text{CDCl}_3$ ):  $\delta$  = 8.13–8.05 (m, 2H), 7.76–7.71 (m, 2H), 7.70–7.61 (m, 2H), 7.10–7.06 (m, 2H), 4.19 (q,  $J$  = 7.0, 2H), 2.72 (s, 3H), 1.55 (t,  $J$  = 7.0, 3H). Spectroscopic data in good agreement with the literature.<sup>[7]</sup>

**1-(3'-Ethoxy-4-biphenyl)ethenone**

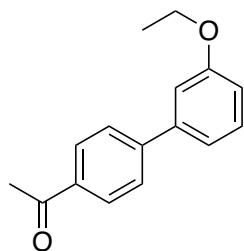

$^1\text{H}$  NMR (500 MHz,  $\text{CDCl}_3$ ):  $\delta$  = 8.17–8.03 (m, 2H), 7.81–7.69 (m, 2H), 7.47 (t,  $J$  = 7.9, 1H), 7.29 (ddd,  $J$  = 7.6, 1.8, 0.9, 1H), 7.25 (dd,  $J$  = 2.5, 1.7, 1H), 7.03 (ddd,  $J$  = 8.3, 2.5, 0.9, 1H), 4.20 (q,  $J$  = 7.0, 2H), 2.73 (s, 3H), 1.55 (t,  $J$  = 7.0, 3H).

**1-(2'-Ethoxy-4-biphenyl)ethenone**

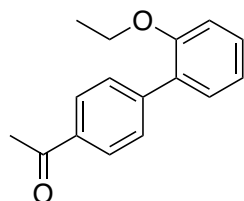

$^1\text{H}$  NMR (500 MHz,  $\text{CDCl}_3$ ):  $\delta$  = 8.11–8.07 (m, 2H), 7.79–7.71 (m, 2H), 7.51–7.40 (m, 2H), 7.13 (td,  $J$  = 7.5, 1.1, 1H), 7.11–7.03 (m, 1H), 4.15 (q,  $J$  = 7.0, 2H), 2.73 (s, 3H), 1.45 (t,  $J$  = 7.0, 3H).

### 1-(4'-Methyl-3-biphenyl)ethenone

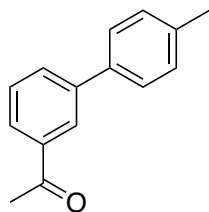

$^1\text{H}$  NMR (500 MHz,  $\text{CDCl}_3$ ):  $\delta$  = 8.27 (t,  $J$  = 1.8, 1H), 8.01 (dt,  $J$  = 7.7, 1.5, 1H), 7.87 (ddd,  $J$  = 7.7, 1.9, 1.1, 1H), 7.64–7.59 (m, 3H), 7.37 (d,  $J$  = 7.8, 2H), 2.75 (s, 3H), 2.51 (s, 3H).

Spectroscopic data in good agreement with the literature.<sup>[5]</sup>

### 1-[3-(2-Methoxy-3-pyridinyl)phenyl]ethenone

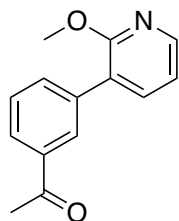

$^1\text{H}$  NMR (500 MHz,  $\text{CDCl}_3$ ):  $\delta$  = 8.30 (dd,  $J$  = 5.0, 1.9, 1H), 8.24 (t,  $J$  = 1.7, 1H), 8.04 (ddd,  $J$  = 7.7, 1.9, 1.1, 1H), 7.87 (ddd,  $J$  = 7.7, 1.9, 1.2, 1H), 7.74 (dd,  $J$  = 7.3, 1.9, 1H), 7.62 (t,  $J$  = 7.7, 1H), 7.10 (dd,  $J$  = 7.3, 5.0, 1H), 4.09 (s, 3H), 2.74 (s, 3H).

### 1-(4'-Ethoxy-3-biphenyl)ethenone

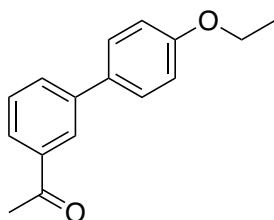

$^1\text{H}$  NMR (500 MHz,  $\text{CDCl}_3$ ):  $\delta$  = 8.24 (t,  $J$  = 1.8, 1H), 7.98 (ddd,  $J$  = 7.7, 1.7, 1.1, 1H), 7.85 (ddd,  $J$  = 7.8, 1.9, 1.1, 1H), 7.68–7.63 (m, 2H), 7.60 (t,  $J$  = 7.7, 1H), 7.10–7.06 (m, 2H), 4.18 (q,  $J$  = 7.0, 2H), 2.75 (s, 3H), 1.55 (t,  $J$  = 7.0, 3H).

### 1-(3'-Ethoxy-3-biphenyl)ethenone

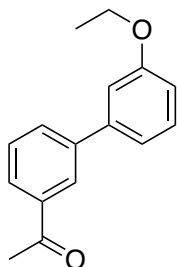

$^1\text{H}$  NMR (500 MHz,  $\text{CDCl}_3$ ):  $\delta$  = 8.27 (t,  $J$  = 1.9, 1H), 8.03 (ddd,  $J$  = .7, 1.8, 1.2, 1H), 7.88 (ddd,  $J$  = 7.7, 1.9, 1.1, 1H), 7.63 (t,  $J$  = 7.7, 1H), 7.49–7.44 (m, 1H), 7.29 (ddd,  $J$  = 7.6, 1.7, 0.9, 1H), 7.24 (dd,  $J$  = 2.5, 1.7, 1H), 7.02 (ddd,  $J$  = 8.2, 2.5, 0.9, 1H), 4.21 (q,  $J$  = 7.0, 2H), 2.75 (s, 3H), 1.55 (t,  $J$  = 6.9, 3H).

### 1-(2'-Ethoxy-3-biphenyl)ethenone

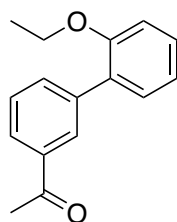

$^1\text{H}$  NMR (500 MHz,  $\text{CDCl}_3$ ):  $\delta$  = 8.29 (t,  $J$  = 1.8, 1H), 8.02 (dt,  $J$  = 7.8, 1.5, 1H), 7.86 (dt,  $J$  = 7.6, 1.4, 1H), 7.59 (t,  $J$  = 7.7, 1H), 7.47–7.39 (m, 2H), 7.14 (td,  $J$  = 7.5, 1.1, 1H), 7.09 (dd,  $J$  = 8.2, 1.1, 1H), 4.16 (q,  $J$  = 7.0, 2H), 2.73 (s, 3H), 1.46 (t,  $J$  = 7.0, 3H).

### 1-(4'-Methyl-2-biphenyl)ethenone

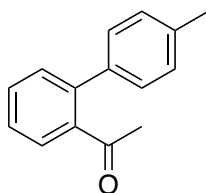

$^1\text{H}$  NMR (500 MHz,  $\text{CDCl}_3$ ):  $\delta$  = 7.64 (dd,  $J$  = 7.7, 1.5, 1H), 7.63–7.54 (m, 1H), 7.52–7.46 (m, 2H), 7.33 (s, 4H), 2.51 (s, 3H), 2.47 (s, 3H).

Spectroscopic data in good agreement with the literature.<sup>[8]</sup>

### 1-(4'-Ethoxy-2-biphenyl)ethenone

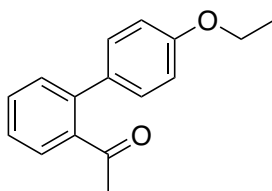

$^1\text{H}$  NMR (500 MHz,  $\text{CDCl}_3$ ):  $\delta$  = 7.86–7.82 (m, 1H), 7.64–7.59 (m, 1H), 7.60–7.53 (m, 1H), 7.51–7.45 (m, 1H), 7.38–7.32 (m, 2H), 7.08–7.02 (m, 2H), 4.22 (q,  $J$  = 6.9, 2H), 2.11 (s, 3H), 1.56 (t,  $J$  = 6.9, 3H).

**1-(3'-Ethoxy-2-biphenyl)ethenone**

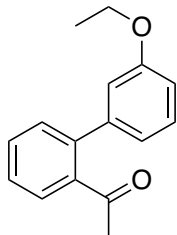

$^1\text{H}$  NMR (500 MHz,  $\text{CDCl}_3$ ):  $\delta$  = 7.63 (dd,  $J$  = 7.4, 1.5, 1H), 7.60 (td,  $J$  = 7.5, 1.5, 1H), 7.52 (dd,  $J$  = 7.4, 1.2, 2H), 7.51–7.46 (m, 1H), 7.03 (ddd,  $J$  = 8.3, 2.5, 1.0, 1H), 7.01–6.99 (m, 1H), 6.98 (dd,  $J$  = 2.5, 1.6, 1H), 4.19 (d,  $J$  = 6.9, 2H), 2.13 (s, 3H), 1.53 (t,  $J$  = 7.1, 3H).

**1-(2'-Ethoxy-2-biphenyl)ethenone**

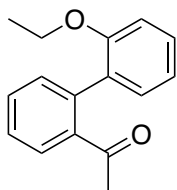

$^1\text{H}$  NMR (500 MHz,  $\text{CDCl}_3$ ):  $\delta$  = 7.76–7.69 (m, 1H), 7.60 (td,  $J$  = 7.6, 1.5, 1H), 7.41 (s, 2H), 7.14 (dd,  $J$  = 7.5, 1.1, 1H), 7.04–7.00 (m, 3H), 4.07 (q,  $J$  = 7.0, 2H), 2.22 (s, 3H), 1.51 (t,  $J$  = 7.0, 3H).

**4-Methyl-4'-nitrobiphenyl**

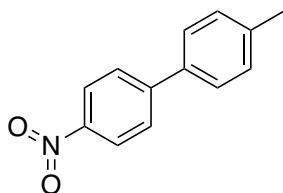

$^1\text{H}$  NMR (500 MHz,  $\text{CDCl}_3$ ):  $\delta$  = 8.39–8.35 (m, 2H), 7.83–7.80 (m, 2H), 7.65–7.60 (m, 2H), 7.40 (d,  $J$  = 7.9, 2H), 2.52 (s, 3H).

Spectroscopic data in good agreement with the literature.<sup>[9]</sup>

### 2-Methoxy-3-(4-nitrophenyl)pyridine

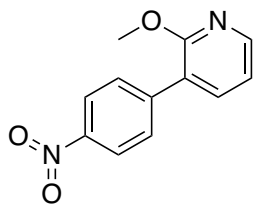

<sup>1</sup>H NMR (500 MHz, CDCl<sub>3</sub>)  $\delta$  = 8.40–8.36 (m, 2H), 8.34 (dd,  $J$  = 5.0, 1.8, 1H), 7.86–7.83 (m, 2H), 7.76 (dd,  $J$  = 7.3, 1.9, 1H), 7.13 (dd,  $J$  = 7.3, 5.0, 1H), 4.04 (s, 3H).

### 4-Ethoxy-4'-nitrobiphenyl

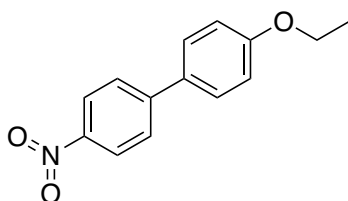

<sup>1</sup>H NMR (500 MHz, CDCl<sub>3</sub>):  $\delta$  = 8.38–8.33 (m, 2H), 7.81–7.76 (m, 2H), 7.69–7.64 (m, 2H), 7.12–7.08 (m, 2H), 4.20 (q,  $J$  = 6.9, 2H), 1.55 (t,  $J$  = 7.0, 3H).

Spectroscopic data in good agreement with the literature.<sup>[7]</sup>

### 3-Ethoxy-4'-nitrobiphenyl

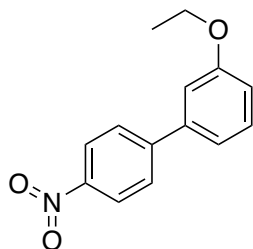

<sup>1</sup>H NMR (500 MHz, CDCl<sub>3</sub>):  $\delta$  = 8.40–8.36 (m, 2H), 7.84–7.80 (m, 2H), 7.49 (t,  $J$  = 7.9, 1H), 7.29 (ddd,  $J$  = 7.7, 1.8, 0.9, 1H), 7.24 (dd,  $J$  = 2.5, 1.7, 1H), 7.07 (ddd,  $J$  = 8.2, 2.5, 0.9, 1H), 4.21 (q,  $J$  = 7.0, 2H), 1.56 (t,  $J$  = 7.0, 3H).

### 2-Ethoxy-4'-nitrobiphenyl

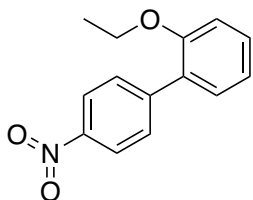

$^1\text{H}$  NMR (500 MHz,  $\text{CDCl}_3$ ):  $\delta$  = 8.37–8.32 (m, 2H), 7.84–7.80 (m, 2H), 7.47 (ddd,  $J$  = 8.2, 7.4, 1.8, 1H), 7.44 (dd,  $J$  = 7.6, 1.7, 1H), 7.15 (td,  $J$  = 7.5, 1.1, 1H), 7.10 (dd,  $J$  = 8.3, 1.0, 1H), 4.17 (q,  $J$  = 7.0, 2H), 1.46 (t,  $J$  = 7.0, 3H).

#### 4'-Methyl-4-biphenylol

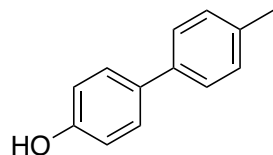

$^1\text{H}$  NMR (500 MHz,  $\text{CDCl}_3$ ):  $\delta$  = 7.54 (dd,  $J$  = 4.5, 2.0, 2H), 7.53–7.51 (m, 2H), 7.32–7.29 (m, 2H), 7.00–6.96 (m, 2H), 2.47 (s, 3H).

Spectroscopic data in good agreement with the literature.<sup>[10]</sup>

#### 2-Methoxy-3-(4-phenylol)pyridine

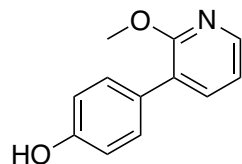

$^1\text{H}$  NMR (500 MHz,  $\text{CDCl}_3$ ):  $\delta$  = 8.21 (dd,  $J$  = 5.0, 1.9, 1H), 7.69 (dd,  $J$  = 2.0, 0.9, 1H), 7.55–7.50 (m, 2H), 7.04 (dd,  $J$  = 7.2, 5.0, 1H), 7.01–6.98 (m, 2H), 3.87 (s, 3H).

#### 4'-Ethoxy-4-biphenylol

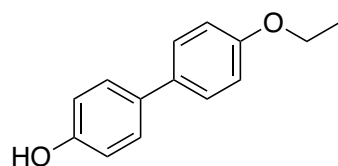

$^1\text{H}$  NMR (500 MHz,  $\text{CDCl}_3$ ):  $\delta$  = 7.56–7.52 (m, 2H), 7.51–7.48 (m, 2H), 7.05–7.01 (m, 2H), 6.99–6.95 (m, 2H), 4.15 (q,  $J$  = 7.1, 2H), 1.52 (t,  $J$  = 7.0, 3H).

#### 3'-Ethoxy-4-biphenylol

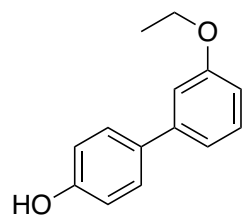

$^1\text{H}$  NMR (500 MHz,  $\text{CDCl}_3$ ):  $\delta$  = 7.57–7.52 (m, 2H), 7.39 (t,  $J$  = 7.9, 1H), 7.21 (ddd,  $J$  = 7.7, 1.7, 1.0, 1H), 7.17 (dd,  $J$  = 2.5, 1.7, 1H), 7.01–6.97 (m, 2H), 6.92 (ddd,  $J$  = 8.2, 2.6, 0.9, 1H), 4.18 (q,  $J$  = 7.0, 2H), 1.53 (t,  $J$  = 7.0, 3H).

### 2'-Ethoxy-4-biphenylol

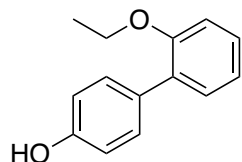

$^1\text{H}$  NMR (500 MHz,  $\text{CDCl}_3$ ):  $\delta$  = 7.41–7.35 (m, 3H), 7.01 (dt,  $J$  = 7.4, 1.1, 1H), 6.99 (dt,  $J$  = 7.8, 1.0, 2H), 6.83–6.78 (m, 2H), 4.13 (q,  $J$  = 7.0, 2H), 1.51 (t,  $J$  = 7.0, 3H).

All NMR spectra are available: <https://doi.org/10.7488/ds/3108>

## S14 References

- [1] M. J. Capeness, V. Echavarri-Bravo, L. E. Horsfall, *Front. Microbiol.* 2019, **10**, 997.
- [2] S. S. Wang, *J. Am. Chem. Soc.* 1973, **95**, 1328.
- [3] D. A. Armbruster, T. Pry, *Clin. Biochem. Rev.* 2008, **29**, S49.
- [4] E. Alacid, C. Nájera, *Org. Lett.* 2008, **10**, 5011.
- [5] M. Tobisu, T. Xu, T. Shimasaki, N. Chatani, *J. Am. Chem. Soc.* 2011, **133**, 19505.
- [6] M. A. Pena, J. P. Sestelo, L. A. Sarandeses, *J. Org. Chem.* 2007, **72**, 1271.
- [7] P. Lan, D. Berta, J. A. Porco, M. S. South, J. J. Parlow, *J. Org. Chem.* 2003, **68**, 9678.
- [8] L. J. Goossen, N. Rodríguez, C. Linder, *J. Am. Chem. Soc.* 2008, **130**, 15248.
- [9] M. L. N. Rao, D. N. Jadhav, D. Banerjee, *Tetrahedron* 2008, **64**, 5762.
- [10] S. A. Moteki, J. M. Takacs, *Angew. Chem. Int. Ed.* 2008, **47**, 894.
